# Supplementary material for: Glycopyrrolate/eFlow CS: The First Nebulized Long-Acting Muscarinic Antagonist Approved to Treat Chronic Obstructive Pulmonary Disease
Source: PubMed Central journal article supplement — Ann Pharmacother. 2018 Sep 1;53(3):285–93. doi: 10.1177/1060028018798753 (PMC6357169; doi:10.1177/1060028018798753), 2018-09-01

**Supplementary Figure 1.** Mean change from baseline in FEV<sub>1</sub> AUC<sub>0-12h</sub> by visit at (A) Week 0 and (B) Week 12 (intent-to-treat GOLDEN 3 substudy population).<sup>37</sup> Redrawn with author's permission.

Abbreviations: AUC, area under the curve; FEV<sub>1</sub>, forced expiratory volume in 1 second; GOLDEN, Glycopyrrolate for Obstructive Lung Disease via Electronic Nebulizer.

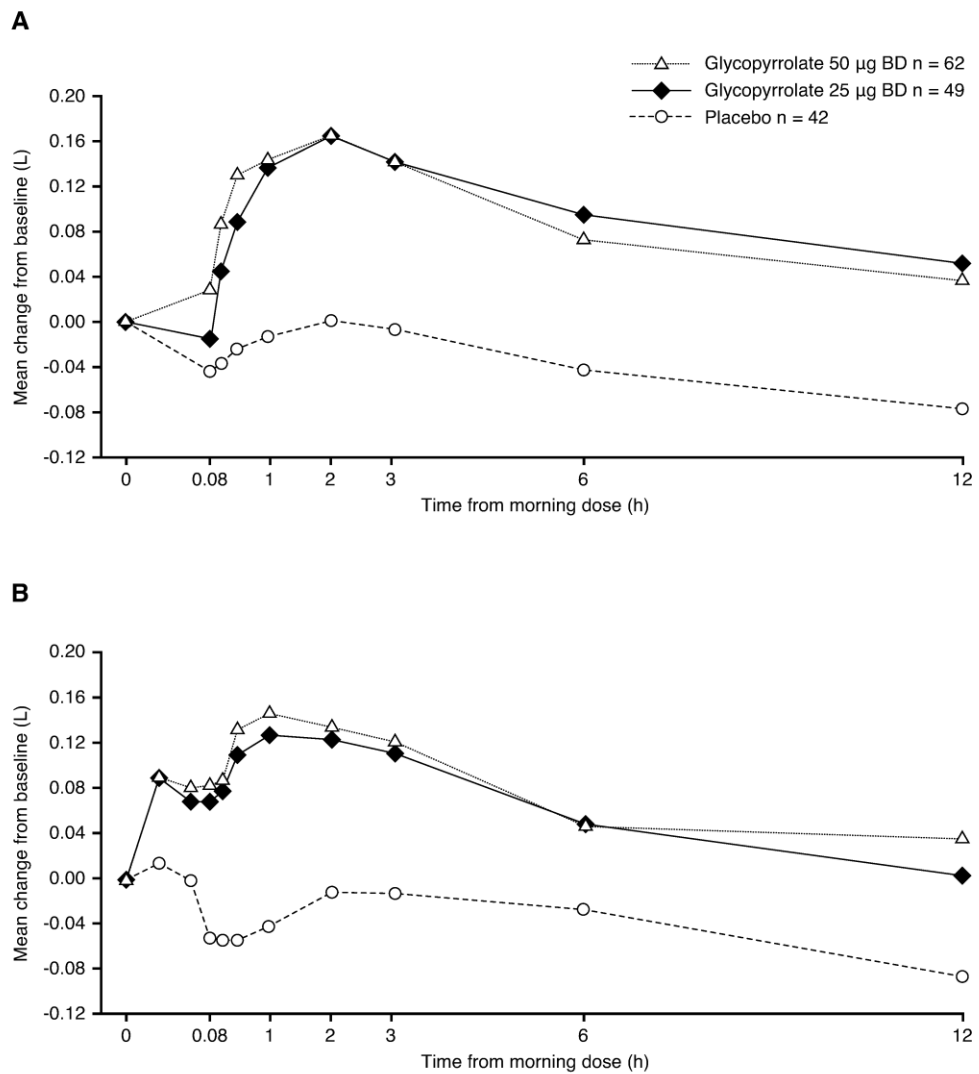

Supplement: Supplementary_Figure.pdf [file Supplementary_Figure.pdf]
